# Supplementary material
Source: PubMed Central journal article supplement (PMC4400764)
Supplement: JCM.00114-15_zjm999094262so1.pdf [file JCM.00114-15_zjm999094262so1.pdf]

**Table S1:** Primers used to detect M184V, T215Y/F, K103N and Y181C mutations.

| Mutations     |                |     | Primer sequence                      | HXB2 location | Product length |
|---------------|----------------|-----|--------------------------------------|---------------|----------------|
| <b>NRTIs</b>  | M184V          | Wt  | 5'-TAAATCAGATCCTACATACAAATCATACAT-3' | 3099-3128     |                |
|               |                | Mut | 5'-TAAGTCAGATCCTACATATAAATCATCCTC-3' | 3099-3128     | 328bp          |
|               | T215Y/F        | Wt  | 5'-TTCTTTCTGATGTTTCTTATCTGGTGTGGT-3' | 3192-3221     |                |
|               |                | Mut | 5'-TTCTTTCTGATGTTTCTTATCTGGTGGGWA-3' | 3192-3221     | 421bp          |
|               | Common forward |     | 5'-CTCAAGACTTCTGGGAGGTCT-3'          | 2800-2820     |                |
| <b>NNRTIs</b> | K103N          | Wt  | 5'-TCTCCCACATCCAGTACTGTTACTGATGTT-3' | 2858-2887     |                |
|               |                | Mut | 5'-TCTCCCACATCCAGTACTGTTACTGAGTTR-3' | 2858-2887     | 300bp          |
|               | Y181C          | Wt  | 5'-ATCCTACATATAAATCATCCACATATTGRT-3' | 3091-3120     |                |
|               |                | Mut | 5'-ATCCTACATATAAATCATCCACATATGGRC-3' | 3091-3120     | 533bp          |
|               | Common forward |     | 5'-AGCCAGGAATGGATGGCCCAA-3'          | 2587-2607     |                |

NRTIs, Nucleoside Reverse Transcriptase Inhibitors; NNRTIs, Non-NRTIs; HXB2, HIV-1 subtype B reference sequence.

**Table S2:** HIV-1 drug resistance mutations by HIV-1 subtypes (CRF02\_AG vs non-CRF02\_AG)

| ARV Class    | Mutation | CRF02_AG (n=53) |              | Non-CRF02_AG (n=22) |              |
|--------------|----------|-----------------|--------------|---------------------|--------------|
|              |          | Sequencing (%)  | ARMS-PCR (%) | Sequencing (%)      | ARMS-PCR (%) |
| <b>NRTI</b>  | M184V    | 23 (43.3)       | 27 (50.9)    | 9 (40.9)            | 8 (36.3)     |
|              | T215Y/F  | 9 (16.9)        | 12 (22.6)    | 5 (22.7)            | 3 (13.6)     |
| <b>NNRTI</b> | K103N    | 22 (41.5)       | 20 (37.7)    | 1 (4.5)             | 1 (4.5)      |
|              | Y181C    | 4 (7.5)         | 6 (11.3)     | 3 (13.6)            | 3 (13.6)     |

ARV, Antiretroviral; ART, Antiretroviral Treatment; NRTI, Nucleoside Reverse Transcriptase Inhibitor; NNRTI, Non-NRTI. Percentages were calculated in each column based on the number of individuals in each group (CRF02\_AG or Non-CRF02\_AG).

ARMS-PCR

primers

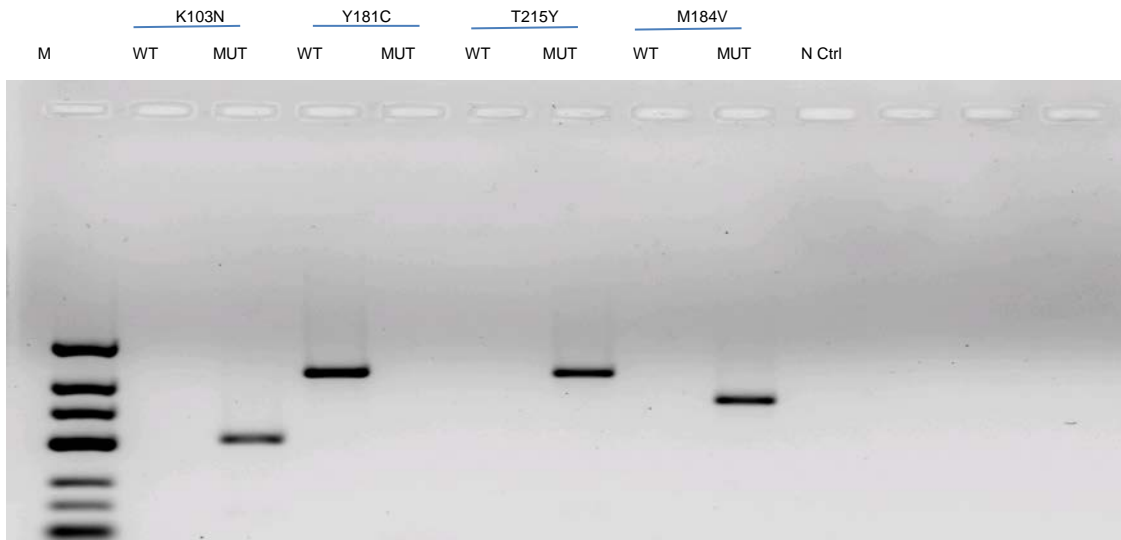

**Figure S1:** Determination of mutation profile of NIH clone (ARP#12229) with the ARMS-PCR assay. This clone is mutant for amino acid (AA) 103 (lane3; 300bp), wild type for AA 181 (lane 4; 533bp), and mutant for AA 215 (lane 9; 421bp), mutant for AA 184 (lane 7; 328bp). M, low range DNA ladder (Thermo Scientific); N Ctrl, negative control.

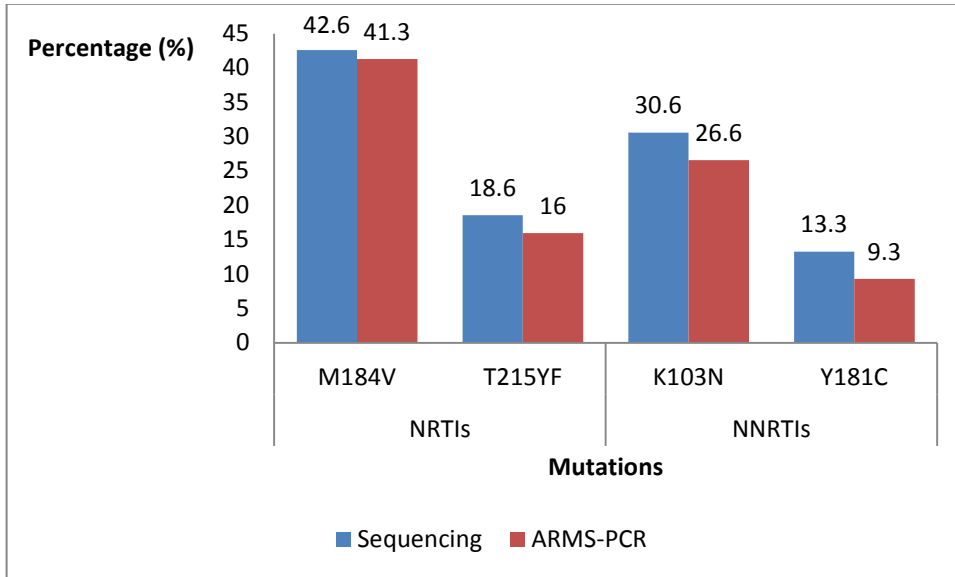

a) Patient level

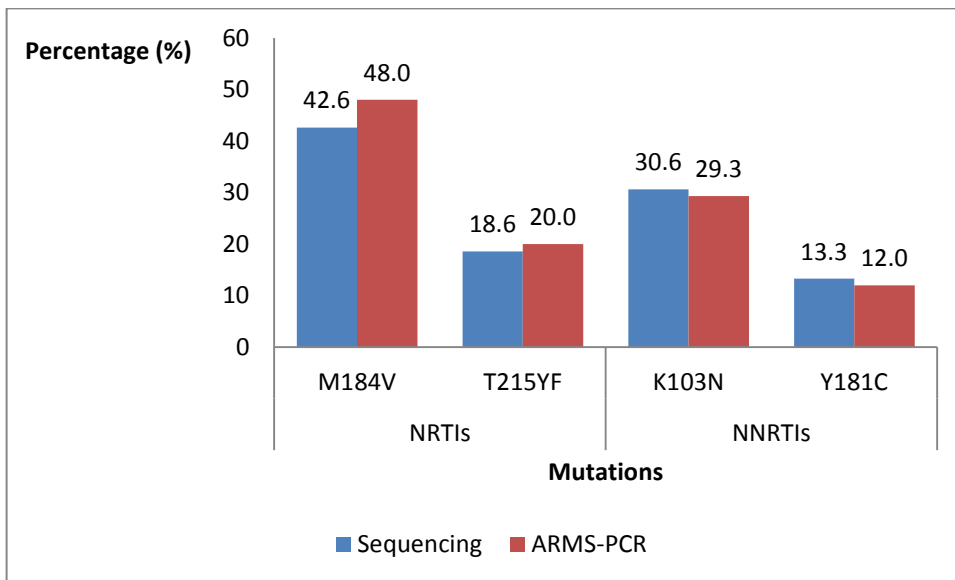

b) Population level

**Figure S2:** The prevalence of the different mutations as determined by sequence analysis and ARMS-PCR when comparing corresponding samples for each patient (a) and at the population level (b). NRTI, Nucleoside Reverse Transcriptase Inhibitor; NNRTI, Non-NRTI; HIV-1 drug resistance mutations analyzed: M184V, T215Y/F, K103N, Y181C.
